# Supplementary material for: The antiviral cytokine interferon‐gamma restricts neural stem/progenitor cell proliferation through activation of STAT1 and modulation of retinoblastoma protein phosphorylation
Source: PubMed Central journal article supplement — J Neurosci Res. 2016 Nov 15;95(8):1582–601. doi: 10.1002/jnr.23987 (PMC5432422; doi:10.1002/jnr.23987), 2016-11-15
Supplement: NIHMS824152-supplement-supplement_1.pdf [file NIHMS824152-supplement-supplement_1.pdf]

**Supplementary Figure 1. Neurosphere cells express IFN $\gamma$ 1.**

Neurospheres were cultured for 3 days *in vitro*, dissociated into a single cell suspension, and stained for neural cell markers and for the R1 subunit of the IFN $\gamma$  receptor (IFN $\gamma$ R1). Antibodies for IFN $\gamma$ R1 ( $\alpha$ -IFNGR1), the NSPC marker nestin ( $\alpha$ -Nestin), and the immature neuron marker doublecortin ( $\alpha$ -DCX) were used along with appropriate isotype controls. The cells were analyzed by flow cytometry and debris was excluded using the gate in **(A)**. IFN $\gamma$ R1 expression was measured for non-permeabilized cells (81.6% positive) and permeabilized cells (61.3% positive) **(B)**. Thus, the permeabilization step reduced IFN $\gamma$ R1 staining by 24.9% compared to non-permeabilized cells. In order to co-label the neurosphere cells with nestin and DCX, permeabilized cells were stained for nestin and IFN $\gamma$ R1 (C) or DCX and IFN $\gamma$ R1 (D). With permeabilization, 55.2% of nestin+ cells were also positive for IFN $\gamma$ R1, and 75.5% of DCX+ cells were also positive for IFN $\gamma$ R1.

**Supplementary Figure 2. IFN $\gamma$  increases BrdU+ cells in the G2/M phase in WT but not STAT1-KO NSPCs.**

The number of BrdU+ cells in the G2/M phase was measured by using the G2/M gate in the BrdU assay. An isotype control for the anti-BrdU antibody was used to delineate BrdU- cells (dotted line) **(A)**. The number of BrdU+ cells within the G2/M gate was quantified for different treatment groups from WT and STAT1-KO NSPCs **(B)**. Differences in cell numbers between IFN $\gamma$ -treated and control groups were determined using one-way ANOVA with Dunnett's post-hoc correction (\*\*  $p < 0.01$ ). **(C)** Differences in

the numbers of BrdU+ cells in the G2/M phase between untreated WT and STAT1-KO NSPCs was determined using a two-tailed unpaired Student's t-test (\*  $p < 0.05$ ).

**Supplementary Figure 3.** *IFN $\gamma$  decreases neurosphere diameter in a STAT1-dependent manner.*

WT or STAT1-KO NSPCs were treated with IFN $\gamma$  (1-1000 U/ml) for indicated times. The diameter ( $\mu\text{m}$ ) of WT neurospheres **(A)** and STAT1-KO neurospheres **(B)** were measured at indicated days post-IFN $\gamma$  treatment. Heat-inactivated IFN $\gamma$  ( $\Delta\text{H-IFN}\gamma$ ; 1000 U/ml) was used as negative control. The average diameter in  $\mu\text{m}$  is plotted for each condition  $\pm$  SEM. Statistical analysis was applied using one-way ANOVA with Dunnett's post-hoc analysis (n=3) \*  $p < 0.05$ , \*\*\*\*  $p < 0.0001$ .

## Supplementary Figure 1

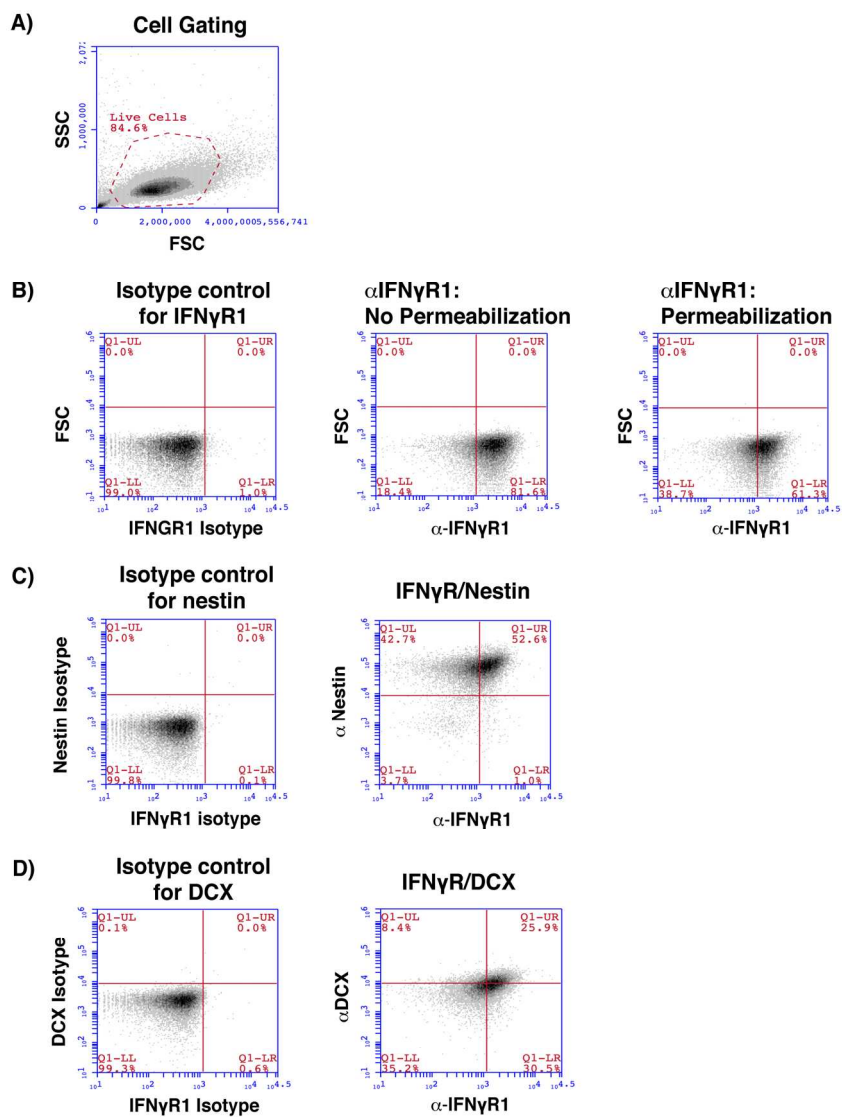

152x203mm (300 x 300 DPI)

Supplementary Figure 2

A) BrdU Isotype control

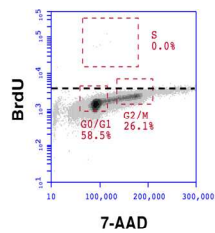

B) WT NSPCs

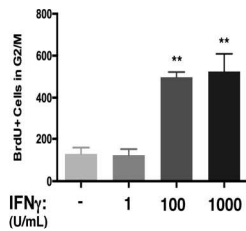

STAT1-KO NSPCs

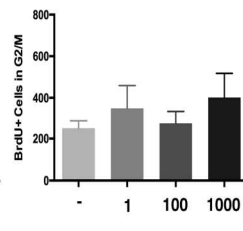

C) Untreated controls

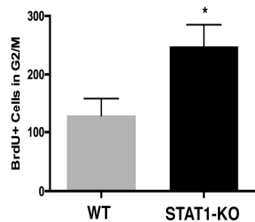

## Supplementary Figure 3

## A) Wildtype NSPCs

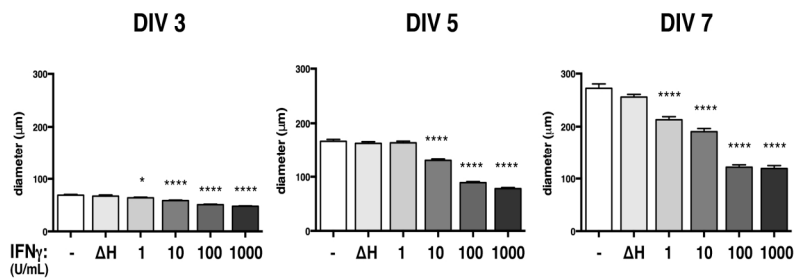

## B) STAT1-KO NSPCs

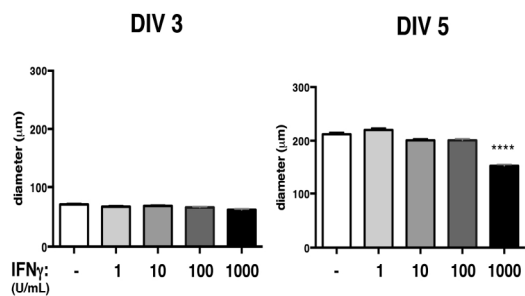

152x203mm (300 x 300 DPI)
